# Supplementary material for: Nanoparticle-enhanced electrical detection of Zika virus on paper microchips
Source: Royal Society of Chemistry journal article supplement (doi:10.1039/c8nr01646a), 2018-01-01
Supplement: c8nr01646a1.pdf [file c8nr01646a1.pdf]

## Electronic Supplementary Information

### Nanoparticle-enhanced electrical detection of Zika virus on paper microchip

Mohamed Shehata Draz,<sup>abc</sup> Manasa Venkataramani,<sup>a†</sup> Harini Lakshminarayanan,<sup>a†</sup> Ecem Saygili,<sup>a†</sup> Maryam Moazeni,<sup>a</sup> Anish Vasan,<sup>a</sup> Yudong Li,<sup>a</sup> Xiaoming Sun,<sup>d</sup> Stephane Hua,<sup>d</sup> Xu G. Yu,<sup>de</sup> Hadi Shafiee<sup>ab\*</sup>

*a. Division of Engineering in Medicine, Department of Medicine, Brigham and Women's Hospital, Harvard Medical School, Boston, Massachusetts 02115*

*b. Department of Medicine, Harvard Medical School, Boston, MA 02115, USA*

*c. Faculty of Science, Tanta University, Tanta 31527, Egypt*

*d. The Ragon Institute of Massachusetts General Hospital, Massachusetts Institute of Technology and Harvard University, Boston, MA 02129*

*e. Division of Infectious Diseases, Department of Medicine, Brigham and Women's Hospital, Harvard Medical School, Boston, Massachusetts 02115*

<sup>†</sup> Authors contributed equally to this work

\* Corresponding author. Email: [hshafiee@bwh.harvard.edu](mailto:hshafiee@bwh.harvard.edu)

## **Supplementary Methods**

### **Synthesis of PtNPs**

Briefly, 36 ml of a 0.2 % solution of chloroplatinic acid hexahydrate was mixed with 464 ml of boiling deionized water. 11 ml of a solution containing 1 % sodium citrate and 0.05 % citric acid was added followed by a quick injection of 5.5 ml of a freshly prepared 0.08 % sodium borohydrate solution, containing 1 % sodium citrate and 0.05 % citric acid. The reaction continued for 10 min and the formed nanoparticles solution was gradually cooled down to room temperature.

### **Virus culture and isolation**

*Aedes albopictus* cells (C6/36) were prepared and infected with ZIKV and harvested. 4 flasks (225 cm<sup>3</sup>) of the cells were prepared and infected with the virus. Infection was carried out by adding serum sample to the culture flask and incubating at an angle of 20 ° at 33 °C for 6 days. After incubation, the virus was harvested by treating with 23 % v/v FBS. The supernatant from the flasks was collected and centrifuged at 4000 g for 30 min. The supernatant after centrifugation was collected without disturbing the cell pellet and 500 µL aliquots were prepared and stored.

### **Biotinylation of Anti- Zika antibodies**

Anti-Zika antibodies were biotinylated using the Biotin type A fast conjugation kit (Abcam, ab201795). 1 µL of Biotin Modifier reagent was added to every 10 µL of antibody to be labeled and was mixed gently. This was added to a vial containing lyophilized Biotin and was left for incubation at room temperature (20 °C to 25 °C) for 15 min. 1 µL of Quencher reagent was then added to every 10 µL of the antibody used. The mixture was incubated at room temperature for 4 min and stored at 4 °C.

### **Magnetic bead modification**

200 µL of streptavidin-coated magnetic beads (Thermo Fisher Scientific- Pierce™ Streptavidin magnetic beads; 88816) of 1 µm diameter was washed thrice using PBS, during which the beads were isolated using a MagnaGrip™ (MilliPore) magnetic stand. 10 µL of the biotinylated target was added to the magnetic bead solution and left for incubation overnight on a shaker at 4 °C. Antibody conjugated beads were then washed twice using PBS and suspended in 2 mL PBS.

## Supplementary Results:

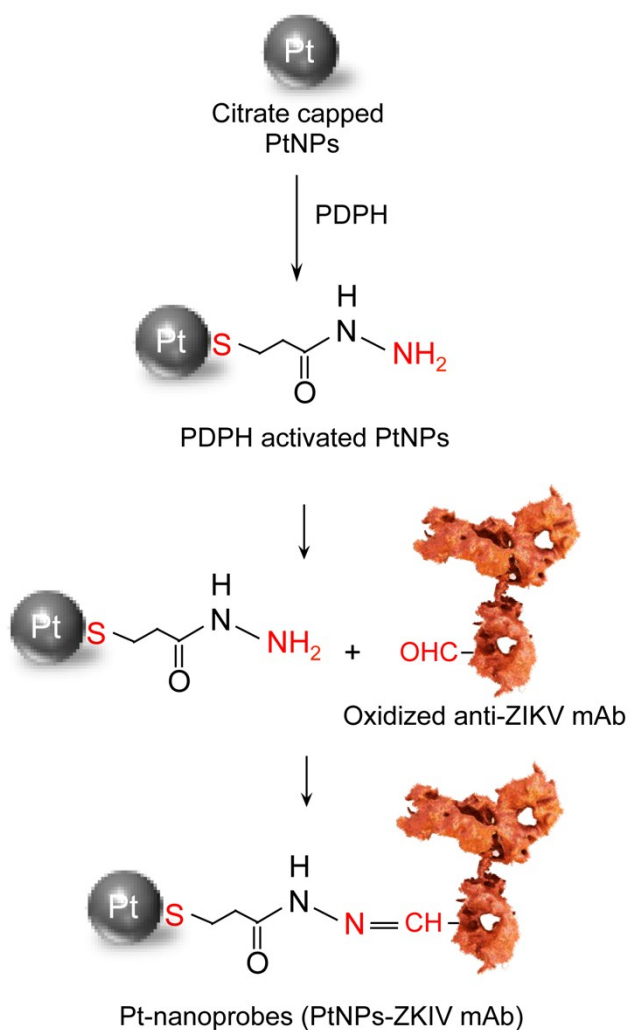

**Figure S1. Detailed preparation protocol of Pt-nanoprobe.** The surface of PtNPs of the prepared platinum nanoparticles (PtNPs) was modified with 3-(2-Pyridyldithio)propionyl hydrazide (PDPH) through the thiol-metal interaction. The hydrazide terminal of PDPH then allowed to couple to the free aldehyde group (CHO) in the oxidized FC region of Zika virus monoclonal antibody (anti-ZIKV mAb), forming the Pt-nanoprobes used in labeling Zika virus.

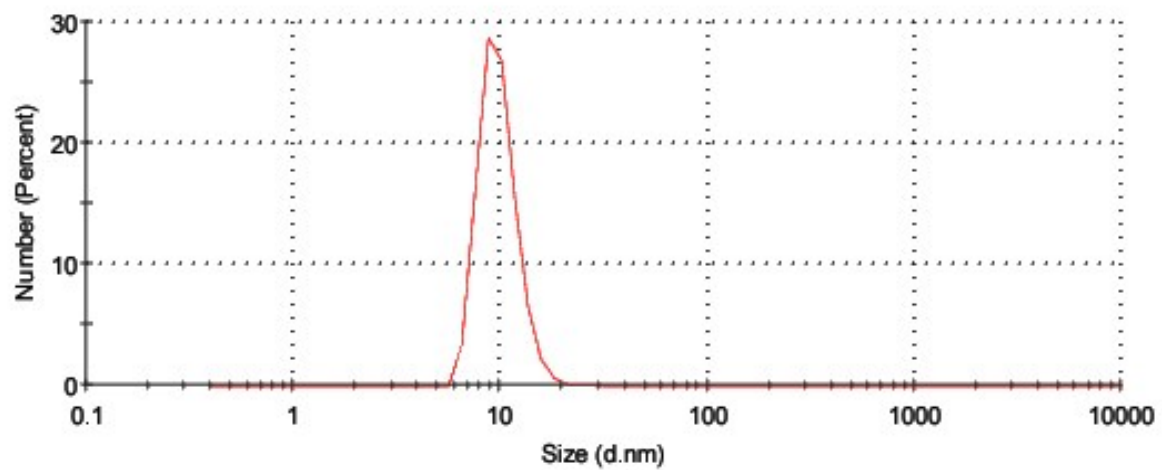

**Figure S2.** Dynamic light scattering (DLS) analysis of the size distribution of the prepared PtNPs used in the preparation of platinum nanoprobe (Pt-nanoprobe).

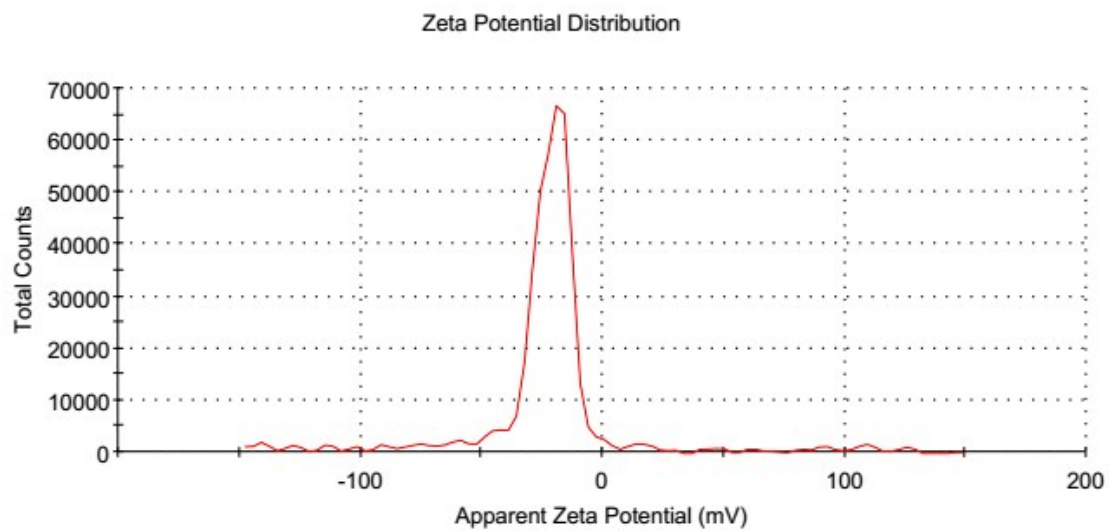

**Figure S3.** Zeta potential of the prepared citrate capped PtNPs used in the preparation of platinum nanoprobe (Pt-nanoprobe).

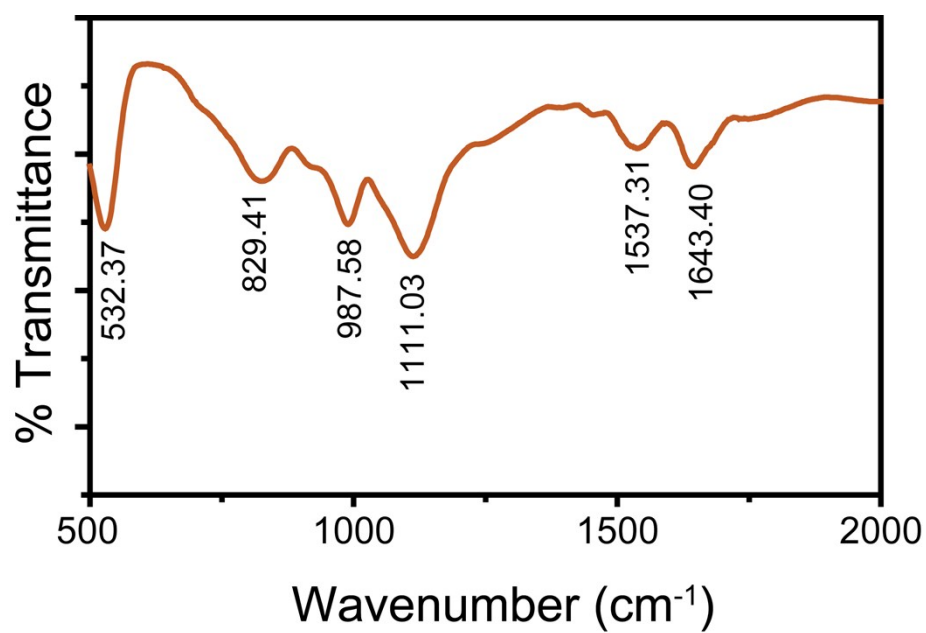

**Figure S4.** FTIR analysis of anti-Zika monoclonal antibody showing different peaks at 1643.40 cm<sup>-1</sup>, 1537.31 cm<sup>-1</sup> and 1111.03 cm<sup>-1</sup> that are characteristics to the amide I and amide II bands of protein.

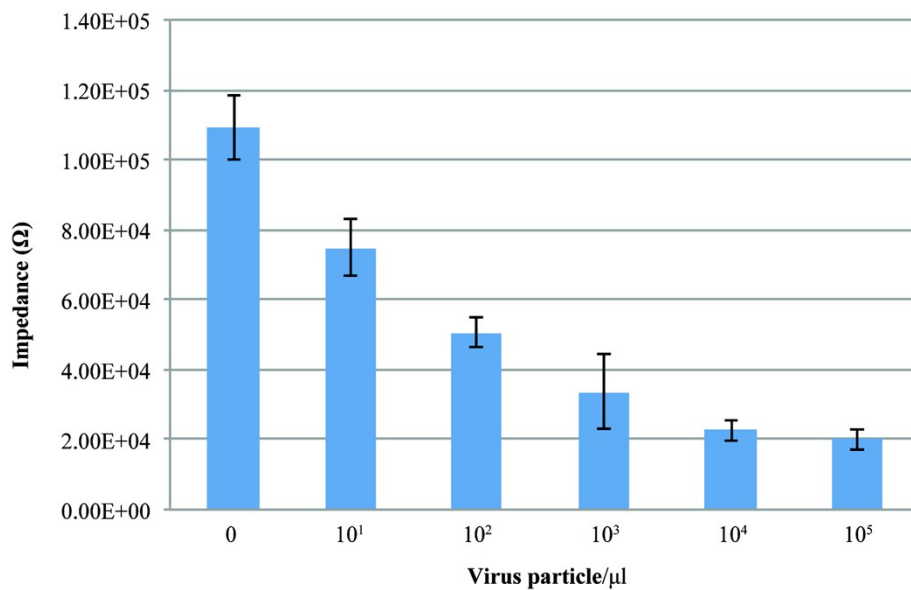

**Figure S5. The detection of ZIKV on the developed paper microchip without post-capture labeling step with Pt-nanoprobes.** Different concentrations of ZIKV ( $10^1$  particle/ $\mu$ l to  $10^5$  particle/ $\mu$ l) were prepared in 1x PBS and captured with magnetic beads, lysed and tested on-chip. Error bars are standard deviations of mean from a total of three independent measurements.

**Table S1.** Summary of common types of paper-based systems recently reported for human viruses detection

| Paper system <sup>a</sup>      | Target virus <sup>b</sup> | Assay type         | Detection Method          | Detection limit                   | Ref.          |
|--------------------------------|---------------------------|--------------------|---------------------------|-----------------------------------|---------------|
| Cellulose paper                | RSV                       | Nucleic acid assay | Colorimetric              | 100 copies                        | <sup>1</sup>  |
|                                | HBV                       | Immunoassay        | Electro-chemiluminescence | 34.2 pg/ml                        | <sup>2</sup>  |
|                                | ZIKV                      | Intact virus assay | Electrical                | 10 <sup>2</sup> particle/ $\mu$ l | Current study |
| Wax-printed cellulose paper    | NoV                       | Immunoassay        | Scattering                | 10 pg/ml                          | <sup>3</sup>  |
|                                | EBOV                      | Nucleic acid assay | Colorimetric              | 10 <sup>7</sup> copies/ $\mu$ l   | <sup>4</sup>  |
|                                | HIV-1                     | Intact virus assay | Electrical                | 10 <sup>7</sup> copies/ml         | <sup>5</sup>  |
| LFA strip                      | DENV                      | Nucleic acid assay | Colorimetric              | 50 copies                         | <sup>6</sup>  |
|                                | HBV                       |                    |                           | 10 <sup>4</sup> copies/ml         | <sup>7</sup>  |
|                                | HPV                       | Immunoassay        | Colorimetric              | NA                                | <sup>8</sup>  |
|                                | HIV-1                     | Intact virus assay | Electrochemical           | NA                                | <sup>9</sup>  |
| Barcode LFA                    | HBV, HCV, HIV-1           | Immunoassay        | Colorimetric              | 0.003 nM                          | <sup>10</sup> |
| Electrochemical paper system   | HHV-5                     | Nucleic acid assay | Electrochemical           | 97 copies/ml                      | <sup>11</sup> |
| Silica sprayed cellulose paper | IAV                       | Immunoassay        | Electrochemical           | 113 PFU/ml                        | <sup>12</sup> |
| NC-paper system                | NoV                       | Nucleic acid assay | Fluorometric              | 4.4 ng/ml, 3.3 ng/ml              | <sup>13</sup> |
| Paper-Dot-ELISA chip           | IAV                       | Immunoassay        | Colorimetric              | NA                                | <sup>14</sup> |

<sup>a</sup> LFA: lateral flow assay; NC: nitrocellulose membrane; ELISA: enzyme-linked immunosorbent assay

<sup>b</sup> DENV: dengue virus; EBOV: Ebola virus; HBV: hepatitis B virus; HCV: hepatitis C virus; HHV-5: herpes virus-5; HIV-1: human immunodeficiency virus-1; HPV: human papillomavirus; IAV: influenza A virus; NoV: norovirus; RSV: respiratory syndrome Virus; ZIKV: Zika virus



## References

1. P. Chaumpluk and A. Suriyasomboon, *Australian Journal of Chemistry*, 2014, **67**, 1434-1440.
2. Y. Chen, J. Wang, Z. Liu, X. Wang, X. Li and G. Shan, *Biochemical Engineering Journal*, 2018, **129**, 1-6.
3. S. Cho, T. S. Park, K. A. Reynolds and J.-Y. Yoon, *SLAS TECHNOLOGY: Translating Life Sciences Innovation*, 2017, **22**, 609-615.
4. L. Magro, B. Jacquelin, C. Escadafal, P. Garneret, A. Kwasiborski, J.-C. Manuguerra, F. Monti, A. Sakuntabhai, J. Vanhomwegen and P. Lafaye, *Scientific reports*, 2017, **7**, 1347.
5. M. Safavieh, V. Kaul, S. Khetani, A. Singh, K. Dhingra, M. K. Kanakasabapathy, M. S. Draz, A. Memic, D. R. Kuritzkes and H. Shafiee, *Nanoscale*, 2017, **9**, 1852-1861.
6. J. R. Choi, K. W. Yong, R. Tang, Y. Gong, T. Wen, H. Yang, A. Li, Y. C. Chia, B. Pingguan-Murphy and F. Xu, *Advanced healthcare materials*, 2017, **6**.
7. R. Tang, H. Yang, J. R. Choi, Y. Gong, J. Hu, T. Wen, X. Li, B. Xu, Q. Mei and F. Xu, *Microchimica Acta*, 2017, **184**, 2141-2150.
8. B. D. Grant, C. A. Smith, P. E. Castle, M. E. Scheurer and R. Richards-Kortum, *Vaccine*, 2016, **34**, 5656-5663.
9. A. Dector, J. Galindo-de-la-Rosa, D. Amaya-Cruz, A. Ortiz-Verdín, M. Guerra-Balcázar, J. Olivares-Ramírez, L. Arriaga and J. Ledesma-García, *International Journal of Hydrogen Energy*, 2017, **42**, 27979-27986.
10. M. Yang, W. Zhang, W. Zheng, F. Cao and X. Jiang, *Lab on a Chip*, 2017, **17**, 3874-3882.
11. J. Narang, C. Singhal, A. Mathur, S. Sharma, V. Singla and C. Pundir, *International journal of biological macromolecules*, 2017.
12. S. Devarakonda, R. Singh, J. Bhardwaj and J. Jang, *Sensors*, 2017, **17**, 2597.
13. X. Weng and S. Neethirajan, *Microchimica Acta*, 2017, **184**, 4545-4552.
14. D. Wu, J. Zhang, F. Xu, X. Wen, P. Li, X. Zhang, S. Qiao, S. Ge, N. Xia and S. Qian, *Microfluidics and Nanofluidics*, 2017, **21**, 43.
